# Supplementary material for: The Photodegradation of Lignin Methoxyl C Promotes Fungal Decomposition of Lignin Aromatic C Measured with 13C-CPMAS NMR
Source: MDPI journal article supplement (doi:10.3390/jof8090900), 2022-08-24
Supplement: s1 [file s1]

## Supporting Information

Article title: **The photodegradation of lignin methoxyl C promotes fungal decomposition of lignin aromatic C measured with  $^{13}\text{C}$ -CPMAS NMR**

Bei Yao<sup>1</sup>, Xiaoyi Zeng<sup>1</sup>, Lu Pang<sup>1</sup>, Xiangshi Kong<sup>1</sup>, Kai Tian<sup>1</sup>, Yanli Ji<sup>1</sup>, Shucun Sun<sup>1</sup>  
and Xingjun Tian<sup>1, 2\*</sup>

<sup>1</sup>School of Life Sciences, Nanjing University, Nanjing 210023, China

<sup>2</sup>College of Eco-Environmental Engineering, Qinghai University, Xining, Qinghai, 810016, China

\*Author of correspondence: Xingjun Tian

Tel: +86 13851857867

E-mail: [tianxj@nju.edu.cn](mailto:tianxj@nju.edu.cn)

### ORCID

Xingjun Tian: <https://orcid.org/0000-0002-0251-2582>

Bei Yao: <https://orcid.org/0000-0001-6434-1806>

Xiangshi kong: <https://orcid.org/0000-0003-3541-5663>

The following Supporting Information is available for this article:

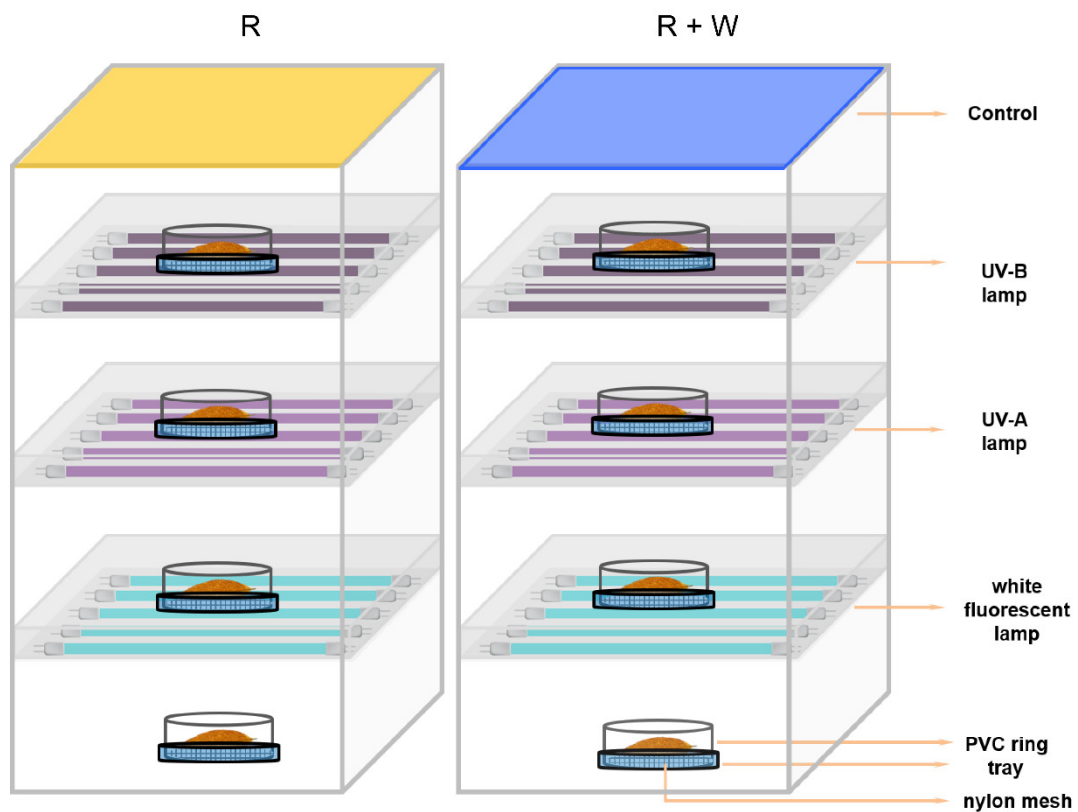

**Figure S1** Radiation wavebands and water pulses were controlled in a microcosm experiment of litter decomposition. Litter materials were exposed to different types of fluorescent lamps (control, PAR, UV-A and UV-B) without and with water pulse treatments (R, radiation; R+W, radiation and water pulses) during each decomposition time.

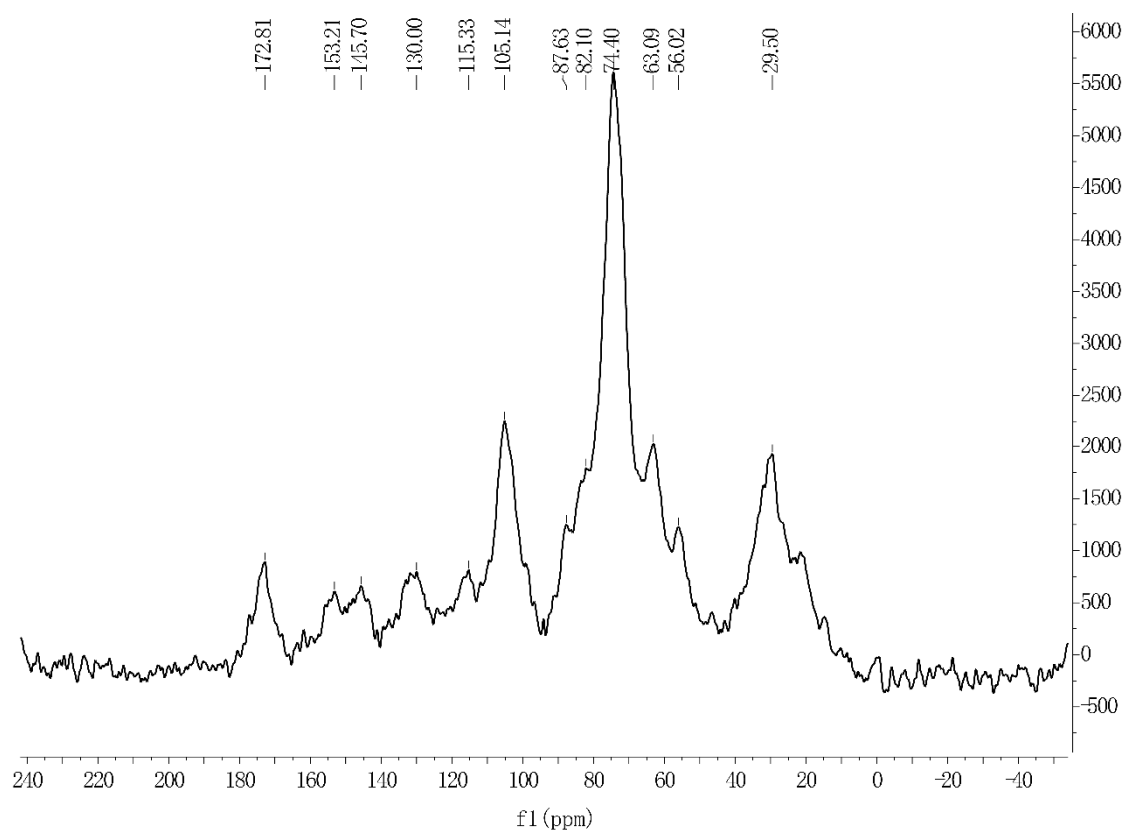

**Figure S2** Solid-state  $^{13}\text{C}$  cross-polarization magic angle spinning (CPMAS) nuclear magnetic resonance (NMR) spectra for initial chemical composition from leaf litter of *Lindera glauca*.

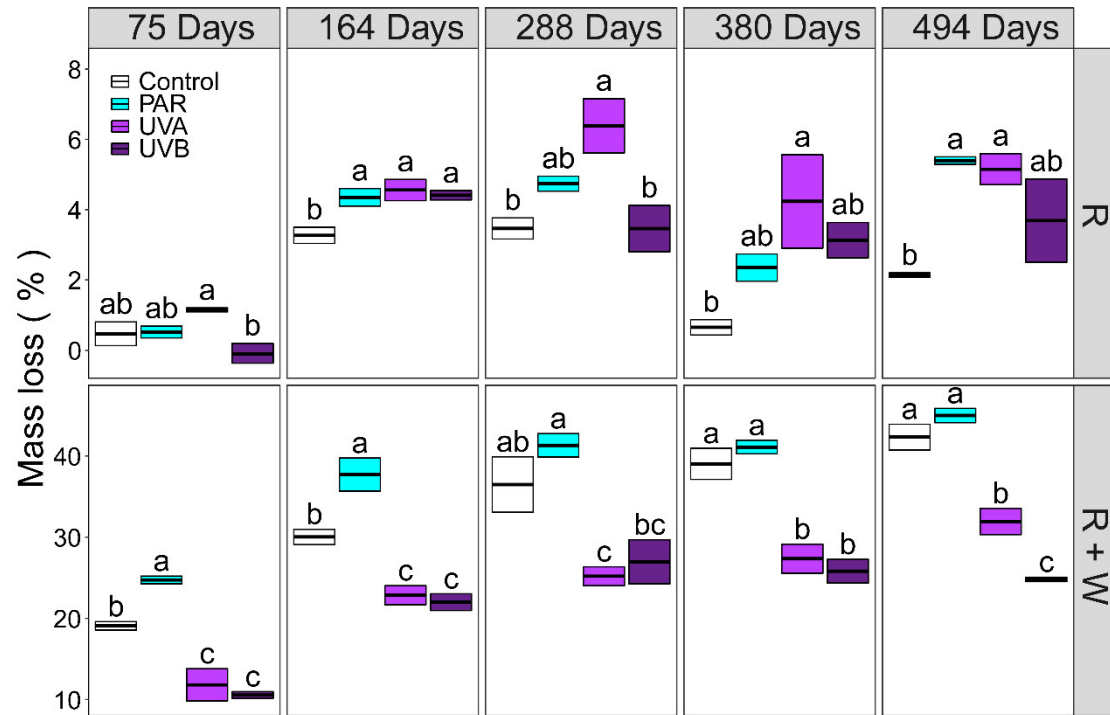

**Figure S3** The mass loss of leaf litter exposed to radiation mediated without and with water pulses during different decomposition stages in a microcosm experiment of litter decomposition. Crossbars represent mean  $\pm$  SE. Letters indicate significant differences among waveband treatments (control, PAR, UV-A and UV-B) without or with water pulse treatments (R, radiation; R+W, radiation and water pulses) during every decomposition stage (mean  $\pm$  SE, n = 3, Tukey's HSD test, P < 0.05).

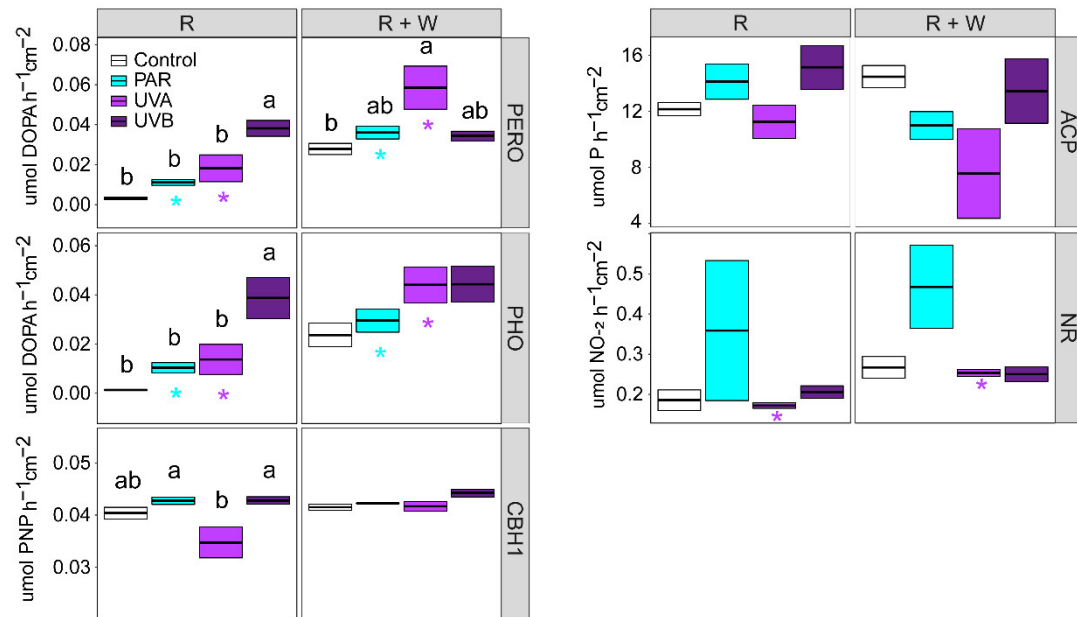

**Figure S4** Microbial enzymatic activities in the surface of decomposing leaf litter on 288 days. Crossbars represent mean  $\pm$  SE. Letters indicate significant differences among waveband treatments (control, PAR, UV-A and UV-B) without or with water pulse treatments (R, radiation; R+W, radiation and water pulses). Asterisks represent significant differences between radiation alone and the combination of radiation and water pulses in each waveband treatment (mean  $\pm$  SE,  $n = 3$ , Tukey's HSD test,  $P < 0.05$ ). PERO, peroxidase; PHO, phenol oxidase; CBH1, cellobiohydrolase; ACP, acid phosphatase; and NR, nitrate reductase.

**Table S1** Chemical composition characterized by solid-state  $^{13}\text{C}$ -CPMAS NMR spectra analyzed by three-way analysis of variance (ANOVA).

| Factor                                | O-substituted aromatic C |       |              | H, C-substituted aromatic C |       |              | di-O-alkyl C |        |              | O-alkyl C |        |              |
|---------------------------------------|--------------------------|-------|--------------|-----------------------------|-------|--------------|--------------|--------|--------------|-----------|--------|--------------|
|                                       | Df                       | F     | P            | Df                          | F     | P            | Df           | F      | P            | Df        | F      | P            |
| Waveband                              | 3                        | 14.64 | < 0.0001 *** | 3                           | 16.15 | < 0.0001 *** | 3            | 3.60   | 0.02 *       | 3         | 7.67   | 0.0003 ***   |
| Water                                 | 1                        | 9.42  | 0.0035 **    | 1                           | 8.25  | 0.006 **     | 1            | 312.33 | < 0.0001 *** | 1         | 193.87 | < 0.0001 *** |
| Time                                  | 2                        | 57.11 | < 0.0001 *** | 2                           | 57.79 | < 0.0001 *** | 2            | 88.54  | < 0.0001 *** | 2         | 52.19  | < 0.0001 *** |
| Waveband $\times$ Water               | 3                        | 15.25 | < 0.0001 *** | 3                           | 21.67 | < 0.0001 *** | 3            | 1.84   | 0.1525       | 3         | 9.86   | < 0.0001 *** |
| Waveband $\times$ Time                | 6                        | 1.27  | 0.2897       | 6                           | 3.42  | 0.0068 **    | 6            | 0.90   | 0.5006       | 6         | 0.57   | 0.7535       |
| Water $\times$ Time                   | 2                        | 4.65  | 0.0142 *     | 2                           | 12.08 | 0.0001 ***   | 2            | 16.33  | < 0.0001 *** | 2         | 5.44   | 0.0074 **    |
| Waveband $\times$ Water $\times$ Time | 6                        | 2.96  | 0.0153 *     | 6                           | 5.28  | 0.0003 ***   | 6            | 3.06   | 0.0128 *     | 6         | 2.90   | 0.0171 *     |

| Factor                                | Alkyl C |        |              | N-alkyl and methoxyl C |        |              | Carbonyl C |       |              |
|---------------------------------------|---------|--------|--------------|------------------------|--------|--------------|------------|-------|--------------|
|                                       | Df      | F      | P            | Df                     | F      | P            | Df         | F     | P            |
| Waveband                              | 3       | 3.69   | 0.0181 *     | 3                      | 3.93   | 0.0138 *     | 3          | 6.25  | 0.0011 **    |
| Water                                 | 1       | 128.59 | < 0.0001 *** | 1                      | 318.92 | < 0.0001 *** | 1          | 5.47  | 0.0235 *     |
| Time                                  | 2       | 155.45 | < 0.0001 *** | 2                      | 109.85 | < 0.0001 *** | 2          | 66.10 | < 0.0001 *** |
| Waveband $\times$ Water               | 3       | 3.77   | 0.0165 *     | 3                      | 8.37   | 0.0001 ***   | 3          | 21.47 | < 0.0001 *** |
| Waveband $\times$ Time                | 6       | 2.28   | 0.0509       | 6                      | 2.43   | 0.0393 *     | 6          | 2.34  | 0.0458 *     |
| Water $\times$ Time                   | 2       | 13.97  | < 0.0001 *** | 2                      | 33.59  | < 0.0001 *** | 2          | 12.94 | < 0.0001 *** |
| Waveband $\times$ Water $\times$ Time | 6       | 4.03   | 0.0024 **    | 6                      | 1.90   | 0.0993       | 6          | 4.44  | 0.0012 **    |

Degree of freedom, F-value and P statistic are represented by Df, F and P respectively in the table. The decomposition time, water pulse, and radiation waveband are represented by time, water, and waveband, respectively. Significance levels are as follows: \*\*\* 0.001 \*\* 0.01 \* 0.05.

**Table S2** The mass loss analyzed by three-way analysis of variance (ANOVA).

| Factor                  | DF | F       | P                   |
|-------------------------|----|---------|---------------------|
| Waveband                | 3  | 98.58   | < <b>0.0001</b> *** |
| Water                   | 1  | 4914.54 | < <b>0.0001</b> *** |
| Time                    | 4  | 118.10  | < <b>0.0001</b> *** |
| Waveband × Water        | 3  | 114.21  | < <b>0.0001</b> *** |
| Waveband × Time         | 12 | 1.09    | 0.3799              |
| Water × Time            | 4  | 59.13   | < <b>0.0001</b> *** |
| Waveband × Water × Time | 12 | 2.01    | <b>0.0337</b> *     |

Degree of freedom, F-value and P statistic are represented by Df, F and P respectively in the table. The decomposition time, water pulse, and radiation waveband are represented by time, water, and waveband, respectively. Significance levels are as follows: \*\*\* 0.001 \*\* 0.01 \* 0.05.

**Table S3** Solid-state <sup>13</sup>C-CPMAS NMR spectra for initial chemical composition from leaf litter of *Lindera glauca*.

| Carbonyl C    | O-substituted aromatic C | H, C-substituted aromatic C | di-O-alkyl C  | O-alkyl C     | N-alkyl and methoxyl C | Alkyl C       |
|---------------|--------------------------|-----------------------------|---------------|---------------|------------------------|---------------|
| 0.0227±0.0037 | 0.0442±0.0042            | 0.0754±0.0123               | 0.1211±0.0044 | 0.4653±0.0067 | 0.0746±0.0044          | 0.1968±0.0172 |

mean ± SE, n = 3
